# Supplementary material for: Application of molecular docking and ONIOM methods for the description of interactions between anti-quorum sensing active (AHL) analogues and the Pseudomonas aeruginosa LasR binding site
Source: Royal Society of Chemistry journal article supplement (doi:10.1039/c3mb70181f), 2014-02-24
Supplement: c3mb70181f1.pdf [file c3mb70181f1.pdf]

## Supporting information

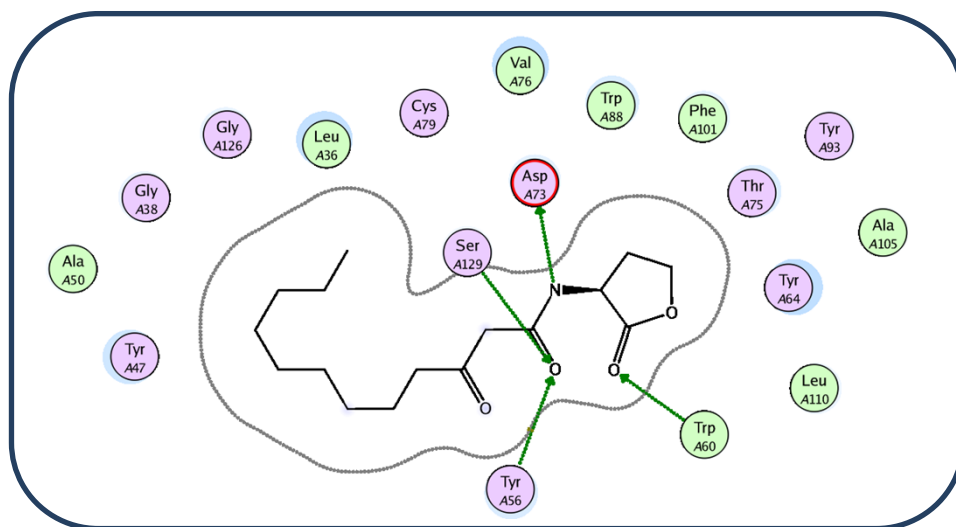

**Figure S-1.** Type hydrogen bond interactions present in protein-ligand complex formed between the dock and native ligand receptor active site *LasR*

**Table S-2.** Classification of Analogues of AHLs with anti-quorum sensing activity

| group | base structure                                                                                                                | Compounds | Substituent(X)                                                                        | IC <sub>50</sub> ( $\mu$ M) |
|-------|-------------------------------------------------------------------------------------------------------------------------------|-----------|---------------------------------------------------------------------------------------|-----------------------------|
| PHL   | 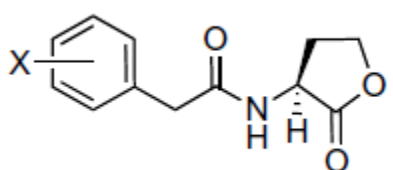 <p>Phenylacetylhomoserine lactones</p>      | 1         | 4-I                                                                                   | 1.72                        |
|       |                                                                                                                               | 2         | 3-I                                                                                   | 4.63                        |
|       |                                                                                                                               | 4         | 3-NO <sub>2</sub>                                                                     | <b>0.61</b>                 |
| POHL  |  <p>Phenoxyacetylhomoserine lactones</p>     | 6         | 4-OCF <sub>3</sub>                                                                    | 4.67                        |
|       |                                                                                                                               | E16       | 3-CH <sub>3</sub>                                                                     | 7.8                         |
|       |                                                                                                                               | E20       | 4-Cl                                                                                  | 4.7                         |
|       |                                                                                                                               | E21       | 4-Br                                                                                  | 2.1                         |
|       |                                                                                                                               | E22       | 4-I                                                                                   | <b>2.0</b>                  |
| PPHL  |  <p>Phenylpropionylhomoserine lactones</p> | 8         | 4-Br                                                                                  | <b>0.34</b>                 |
|       |                                                                                                                               | E26       | 4-CH <sub>3</sub>                                                                     | 4.3                         |
|       |                                                                                                                               | E27       | 3-CH <sub>3</sub>                                                                     | 8.9                         |
|       |                                                                                                                               | E28       | 4-OCH <sub>3</sub>                                                                    | 6.8                         |
|       |                                                                                                                               | E29       | 4-F                                                                                   | 12                          |
|       |                                                                                                                               | E30       | 4-Cl                                                                                  | 2.2                         |
|       |                                                                                                                               | E31       | 3-Br                                                                                  | 3.3                         |
|       |                                                                                                                               | E33       | 3-I                                                                                   | 1.8                         |
|       |                                                                                                                               | E37       | 4-NO <sub>2</sub>                                                                     | 3.0                         |
|       |                                                                                                                               | E38       | 3-NO <sub>2</sub>                                                                     | 3.4                         |
|       |                                                                                                                               | E39       |  | 3.4                         |

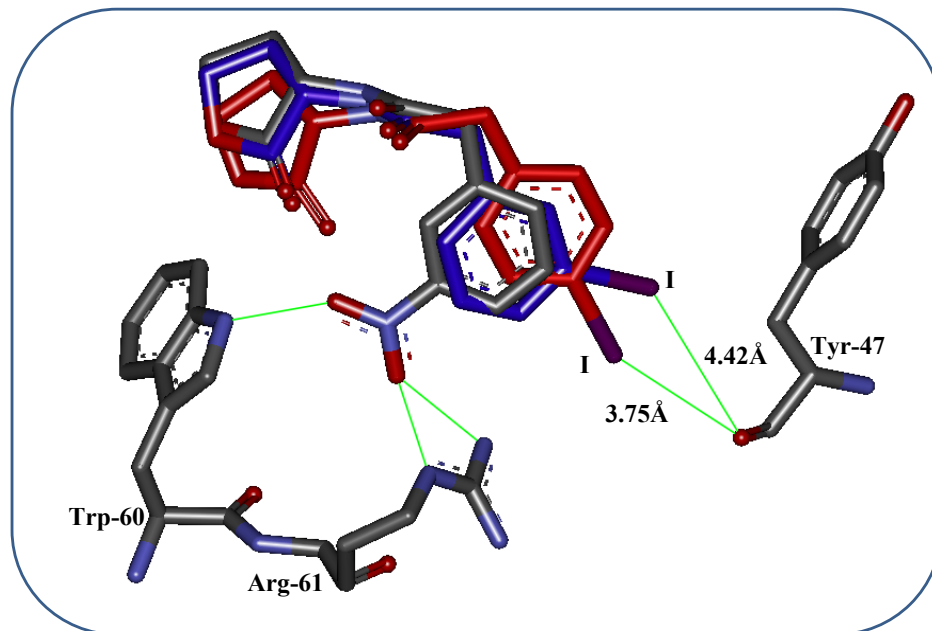

**Figure S-3a.** Interactions between the region B of the ligands (1 red, 2 blue and gray 4) PHLS and residues, Tyr-47, Trp-60 and Arg-61

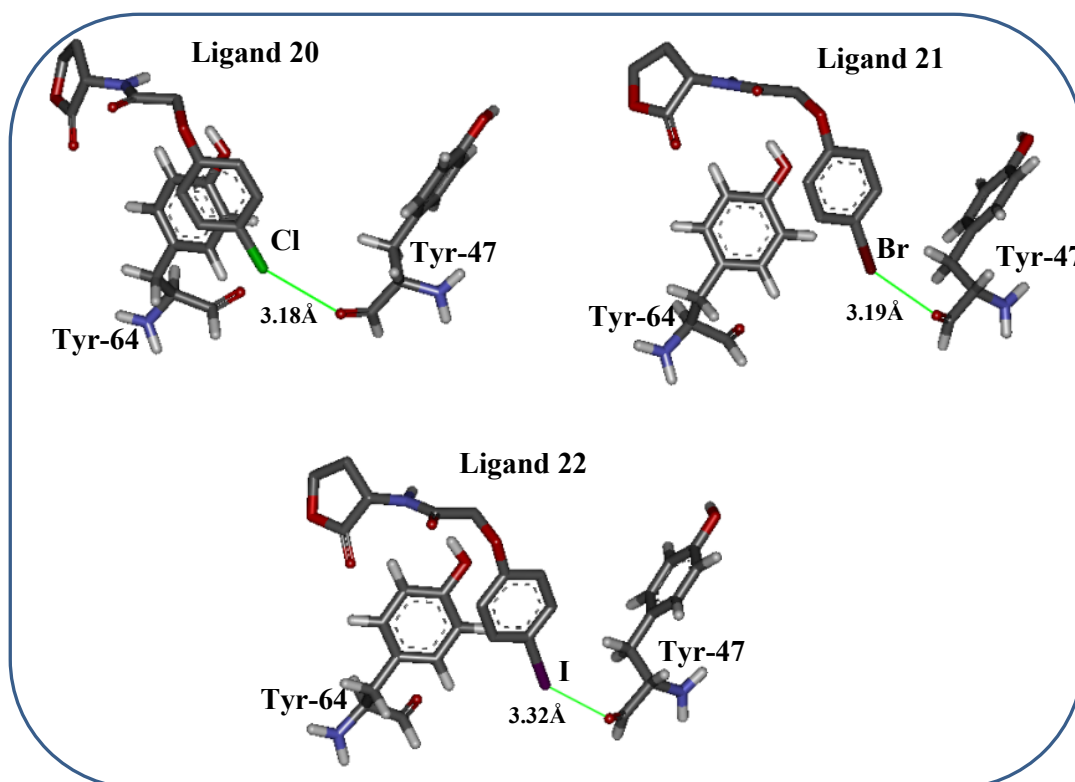

**Figure S-3b.** Bridges halogen ligands present in the E20, E21 and E22. In all cases the sum of the van der Waals radii of atoms involved in halogen bridges, exceeds the distance shown on the graph.

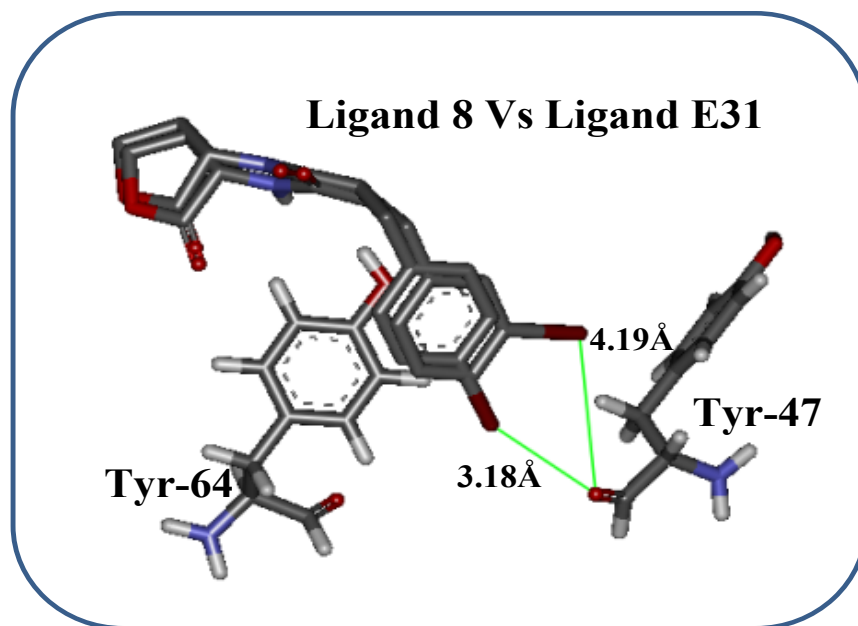

**Figure S-3.** The distances between the bromine atom and oxygen atom of residue Tyr-47, is greater when the substituent is in ring position 3 and for this reason there is not a strong interaction between these atoms

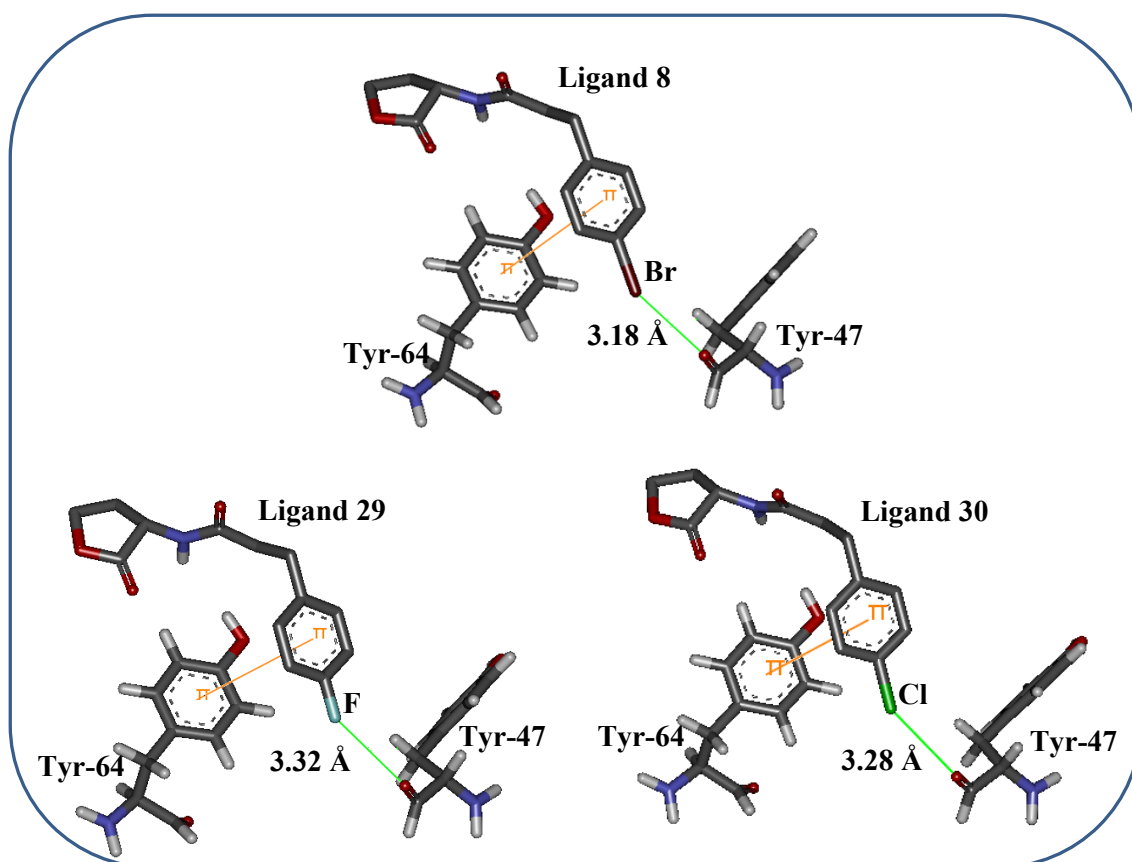

**Figure S-3d.** Bridges halogen ligands present in the E20, E21 and E22. In all cases the sum of the van der Waals radii of atoms involved in halogen bridges, exceeds the distance shown on the graph

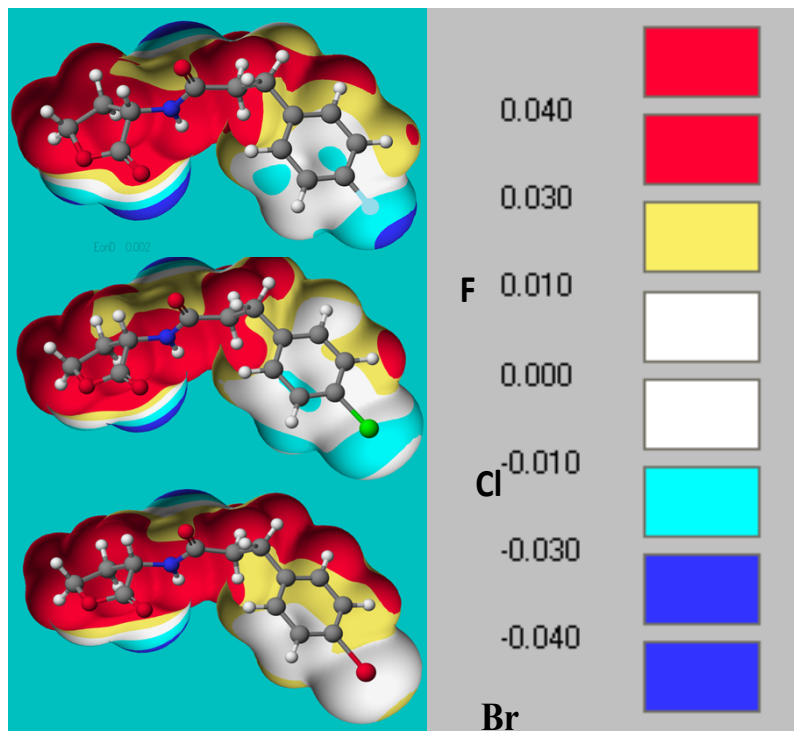

**Figure S-4.** Electrostatic potential surface based on the electron density and the radii of Van der Waals

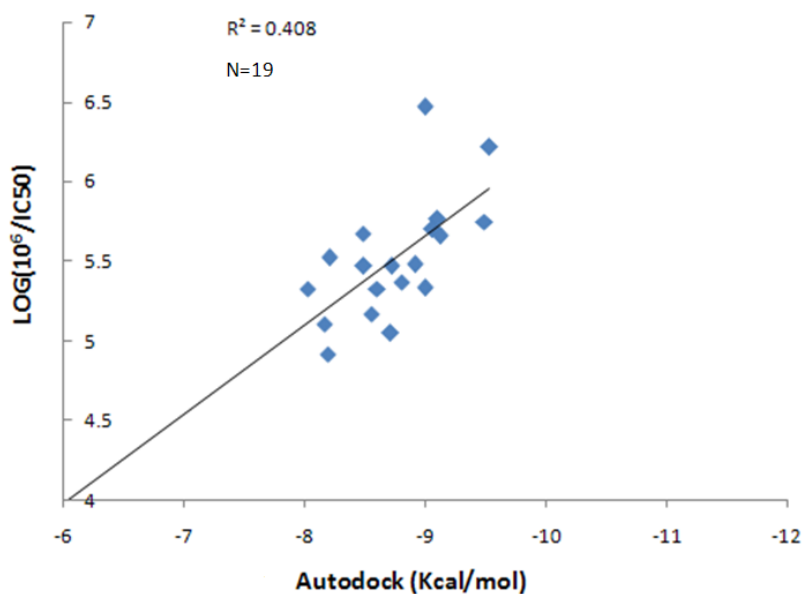

**Figure S-5.** Binding free energy *AutoDock* against the biological activity represented as  $\log (10^6/IC_{50})$

**Table S-6.** ONIOM3 energy and biological activity represented as  $pIC_{50}$

| Ligando | LOG( $10^6/IC_{50}$ )<br>$pIC_{50}$ | $\Delta E^{ONIOM3}$<br>(Kcal/mol) |
|---------|-------------------------------------|-----------------------------------|
| 1       | 5.76                                | -30.50                            |
| 2       | 5.33                                | -28.35                            |
| 4       | 6.21                                | -39.39                            |
| 6       | 5.33                                | -20.12                            |
| 8       | 6.46                                | -36.88                            |
| E16     | 5.10                                | -28.96                            |
| E20     | 5.32                                | -28.70                            |
| E21     | 5.67                                | -31.54                            |
| E22     | 5.69                                | -28.94                            |
| E26     | 5.36                                | -23.61                            |
| E27     | 5.05                                | -24.04                            |
| E28     | 5.16                                | -27.01                            |
| E29     | 4.92                                | -21.94                            |
| E30     | 5.65                                | -31.63                            |
| E31     | 5.48                                | -22.97                            |
| E33     | 5.74                                | -32.75                            |
| E37     | 5.52                                | -29.42                            |
| E38     | 5.46                                | -26.42                            |
| E39     | 5.46                                | -27.95                            |

**Table S-7.** Comparison between the different values of energy and pIC<sub>50</sub>

| Ligand | LOG(10 <sup>6</sup> /IC <sub>50</sub> )<br>pIC <sub>50</sub> | Energy<br>Autodock (Kcal/mol) | $\Delta E^{\text{ONIOM3}}$<br>(Kcal/mol) | $\Delta E^{\text{ONIOM3}}_{\text{solvation}}$<br>(Kcal/mol) |
|--------|--------------------------------------------------------------|-------------------------------|------------------------------------------|-------------------------------------------------------------|
| 1      | 5.76                                                         | -9.1                          | -30.50                                   | -1.99                                                       |
| 2      | 5.33                                                         | -9.44                         | -28.35                                   | -5.65                                                       |
| 4      | 6.21                                                         | -9.53                         | -39.39                                   | -2.61                                                       |
| 6      | 5.33                                                         | -8.02                         | -20.12                                   | 2.81                                                        |
| 8      | 6.46                                                         | -9.06                         | -36.88                                   | -2.12                                                       |
| E16    | 5.10                                                         | -8.16                         | -28.96                                   | 9.41                                                        |
| E20    | 5.32                                                         | -8.6                          | -28.70                                   | -11.13                                                      |
| E21    | 5.67                                                         | -8.48                         | -31.54                                   | -3.92                                                       |
| E22    | 5.69                                                         | -9.06                         | -28.94                                   | -12.13                                                      |
| E26    | 5.36                                                         | -8.8                          | -23.61                                   | -4.83                                                       |
| E27    | 5.05                                                         | -8.71                         | -24.04                                   | -3.36                                                       |
| E28    | 5.16                                                         | -8.55                         | -27.01                                   | -1.07                                                       |
| E29    | 4.92                                                         | -8.19                         | -21.94                                   | -6.71                                                       |
| E30    | 5.65                                                         | -9.12                         | -31.63                                   | -6.55                                                       |
| E31    | 5.48                                                         | -8.91                         | -22.97                                   | -9.43                                                       |
| E33    | 5.74                                                         | -9.49                         | -32.75                                   | -10.95                                                      |
| E37    | 5.52                                                         | -8.2                          | -29.42                                   | -8.36                                                       |
| E38    | 5.46                                                         | -8.49                         | -26.42                                   | 0.99                                                        |
| E39    | 5.46                                                         | -8.72                         | -27.95                                   | -5.96                                                       |
